# Supplementary material for: Valley splitting in the antiferromagnetic heterostructure MnPSe3/WSe2
Source: Royal Society of Chemistry journal article supplement (doi:10.1039/d0tc03065a), 2021-01-01
Supplement: d0tc03065a1.pdf [file d0tc03065a1.pdf]

## Supporting Information

### Valley splitting in the antiferromagnetic heterostructure MnPSe<sub>3</sub>/WSe<sub>2</sub>

Bing-Jie Wang<sup>1,§</sup>, Yu-Yun Sun<sup>1,§</sup>, Ju Chen<sup>1</sup>, Weiwei Ju<sup>4</sup>, Yi-Peng An<sup>5</sup>, Shi-Jing Gong<sup>1,2,3,\*</sup>

<sup>1</sup>*Department of optoelectrics, School of Physics and Electronic Science, East China Normal University, Shanghai, 200241, China*

<sup>2</sup>*Collaborative Innovation Center of Extreme Optics, Shanxi University, Taiyuan, Shanxi, 030006, China*

<sup>3</sup>*Shanghai Institute of Intelligent Electronics & Systems, Fudan University, Shanghai 200433, China*

<sup>4</sup>*College of Physics and Engineering and Henan Key Laboratory of Photoelectric Energy Storage Materials and Applications, Henan University of Science and Technology, Luoyang, 471023, China*

<sup>5</sup>*School of Physics and Henan Key Laboratory of Boron Chemistry and Advanced Energy Materials, Henan Normal University, Xinxiang, 453007, China*

<sup>§</sup> *B -J Wang and Y-Y Sun contributed equally to this work*

<sup>\*</sup> *E-mail: sjgong@ee.ecnu.edu.cn*

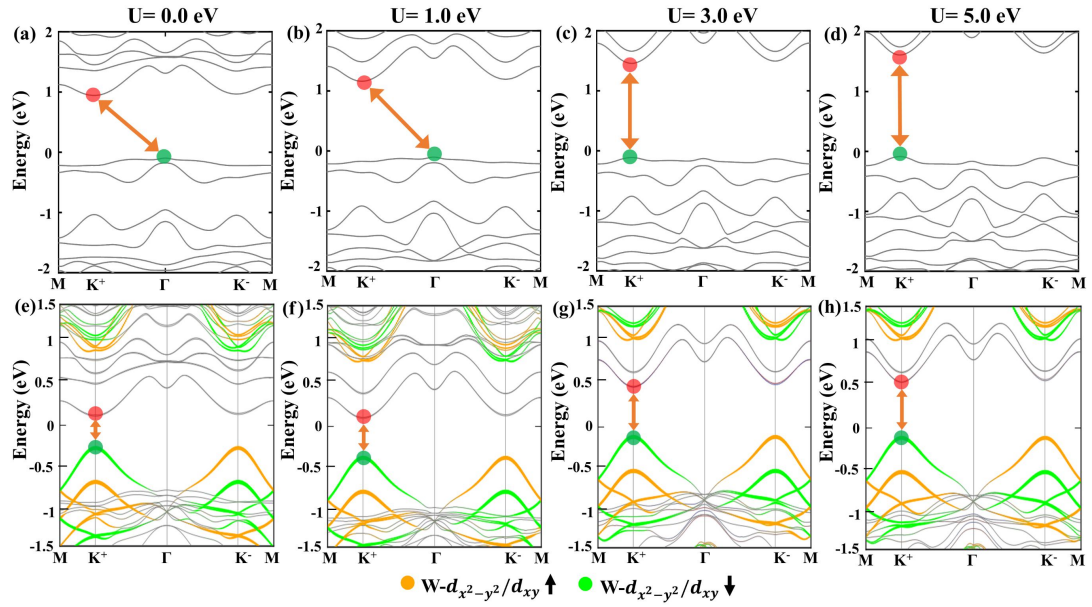

**Fig. S1** Band structures of (a-d) MnPSe<sub>3</sub> monolayer and (e-h) MnPSe<sub>3</sub>/WSe<sub>2</sub> heterostructure with spin orbit coupling (SOC), which are all based on GGA+U method with (a, e) U=0.0 eV, (b, f) U=1.0 eV, (c, g) U=3.0 eV and (d, h) U=5.0 eV.

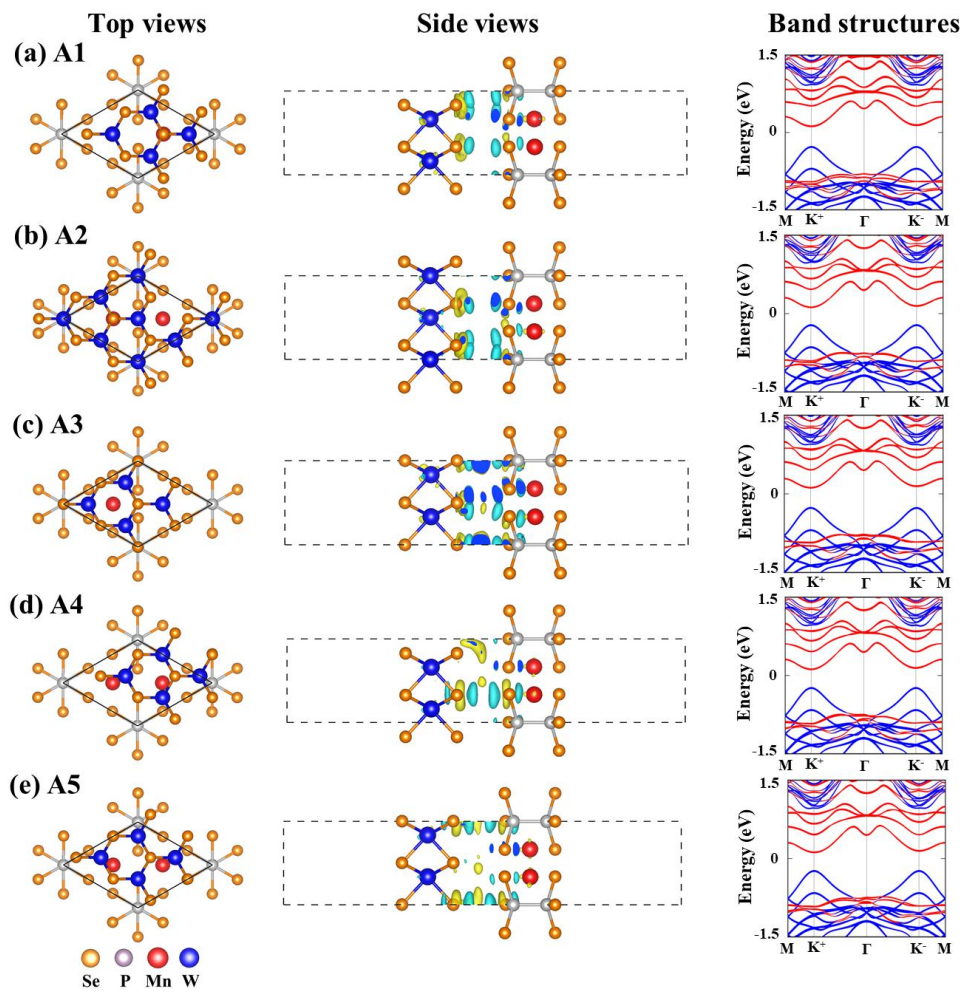

**Fig. S2** Structures and side views of the charge density difference of MnPSe<sub>3</sub>/WSe<sub>2</sub> heterostructures. Yellow (blue) regions represent the net charge gain (loss), and the isosurface value is 1.2 e/nm<sup>3</sup>. The corresponding band structures are shown in the right figures, in which blue and red lines represent the states of WSe<sub>2</sub> and MnPSe<sub>3</sub> layers, respectively.

**Table S1.** Calculated binding energy  $E_b$  (meV), the interlayer distance  $d$  (Å) and valley splitting (meV) of MnPSe<sub>3</sub>/WSe<sub>2</sub> heterostructures with different stacking models.

| Stacking models        | A1     | A2     | A3     | A4     | A5     |
|------------------------|--------|--------|--------|--------|--------|
| $d$ (Å)                | 3.500  | 3.507  | 3.468  | 3.447  | 3.439  |
| $E_b$ (meV)            | -634.5 | -613.9 | -646.3 | -629.0 | -629.4 |
| Valley splitting (meV) | 35.4   | 35.0   | 40.0   | 37.0   | 36.9   |
